# Supplementary material for: Application of an inverse-design method to optimizing porphyrins in dye-sensitized solar cells
Source: Royal Society of Chemistry journal article supplement (doi:10.1039/c8cp07722c), 2019-01-01
Supplement: c8cp07722c1.pdf [file c8cp07722c1.pdf]

Supporting information for:

**Application of an inverse-design method to optimizing  
porphyrins in dye-sensitized solar cells**

Chencheng Fan<sup>\*a</sup>, Michael Springborg<sup>a,b</sup>, Yaqing Feng<sup>c</sup>

<sup>a</sup> *Physical and Theoretical Chemistry, University of Saarland, 66123  
Saarbruecken, Germany.*

<sup>b</sup> *Materials Science, Tianjin University, 300350 Tianjin, China.*

<sup>c</sup> *School of Chemical Engineering, Tianjin University, 300350 Tianjin,  
China.*

*E-mail addresses:*

*chencheng.fan@uni-saarland.de (C. Fan)*

*m.springborg@mx.uni-saarland.de (M. Springborg)*

*yqfeng@tju.edu.cn (Y. Feng)*

Fig. 1 shows the 41 functional groups that were considered in the PooMa calculations. Moreover, Table 1 lists the 206 dyes that were identified in earlier, experimental studies plus the values for their five descriptors as obtained in the DFTB calculations.

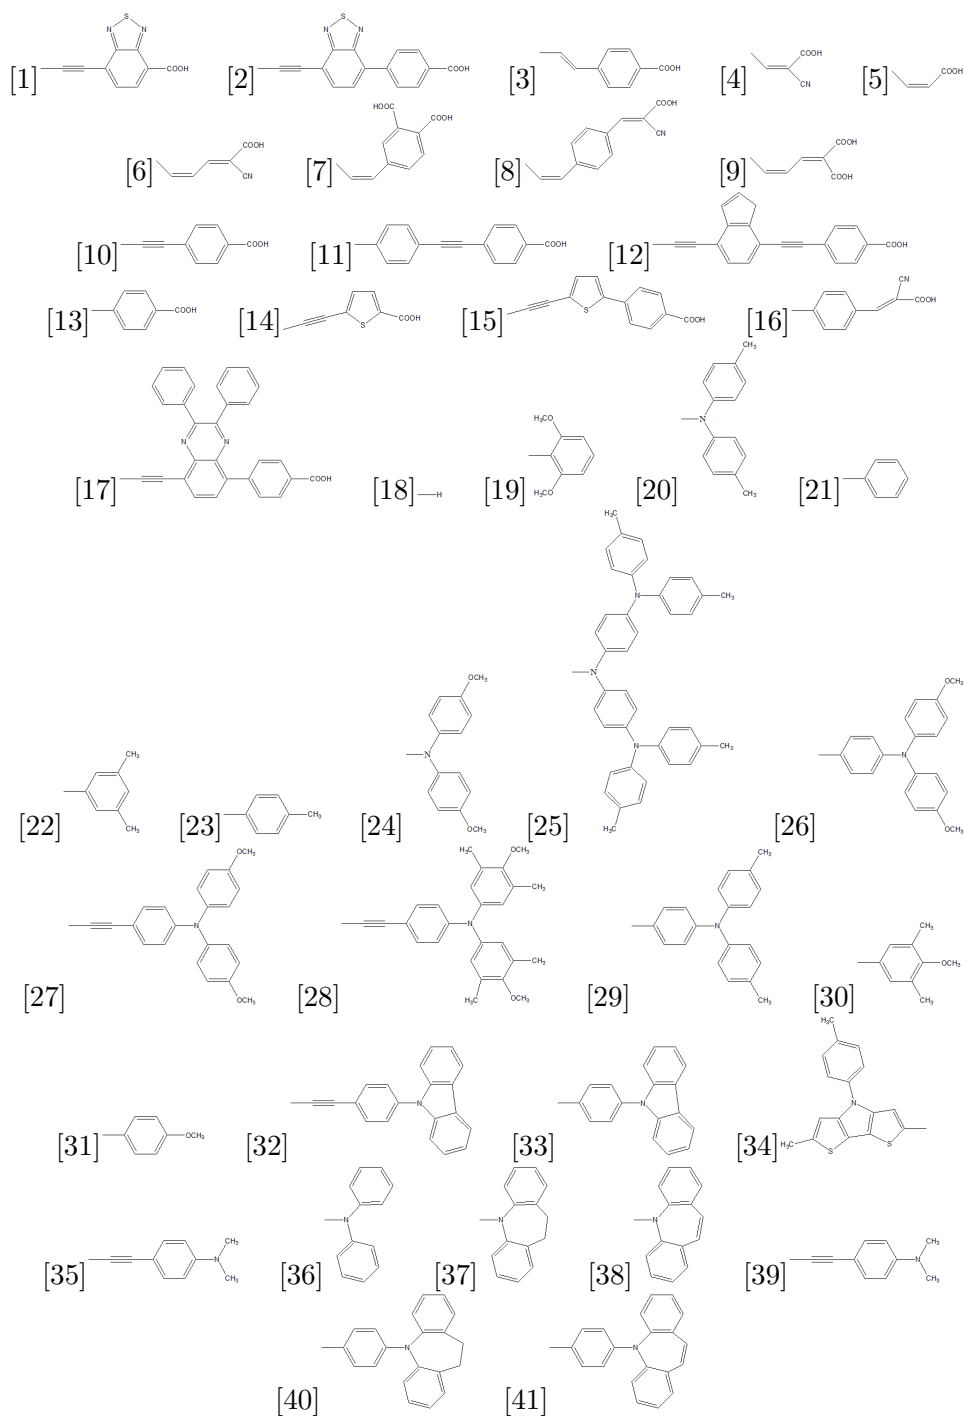

Figure 1: Forty-one substituents in the pool.

Table 1: The set of 206 dyes whose PCE was determined experimentally in other studies. Also shown are the calculated values for their electronic properties as calculated using the DFTB method.

| Molecule | G         | O         | D          | A         | LHE       | PCE (exp.) | Molecule name in Ref. | Ref. |
|----------|-----------|-----------|------------|-----------|-----------|------------|-----------------------|------|
| 1        | 0.0667663 | 0.1098637 | 5.7343099  | 3.4535395 | 0.1145571 | 3.65       | Dye-1                 | 1    |
| 2        | 0.0663543 | 0.1096820 | 6.0609838  | 3.4544885 | 0.1138443 | 2.92       | Dye-2                 | 1    |
| 3        | 0.0664988 | 0.1103366 | 4.8131561  | 3.4586567 | 0.1141258 | 1.85       | Dye-3                 | 1    |
| 4        | 0.0667569 | 0.1106514 | 4.6365321  | 3.4549942 | 0.1144396 | 3.60       | Dye-4                 | 1    |
| 5        | 0.0585169 | 0.1340320 | 10.2152042 | 4.0362108 | 0.1120592 | 3.12       | Ia                    | 2    |
| 6        | 0.0581445 | 0.1203809 | 9.4677291  | 3.7705729 | 0.1056630 | 2.12       | Ib                    | 2    |
| 7        | 0.0582487 | 0.1049978 | 8.3026409  | 3.2347226 | 0.0894526 | 1.56       | Ic                    | 2    |
| 8        | 0.0585103 | 0.0972312 | 7.3989790  | 3.0272590 | 0.0844352 | 1.01       | Id                    | 2    |
| 9        | 0.0651194 | 0.1489580 | 5.0898235  | 3.8586935 | 0.1140304 | 3.55       | IIa                   | 2    |
| 10       | 0.0646801 | 0.1383724 | 4.5471286  | 3.6183750 | 0.1074025 | 4.18       | IIb                   | 2    |
| 11       | 0.0649658 | 0.1212406 | 4.3987205  | 3.1155014 | 0.0917486 | 4.79       | IIc                   | 2    |
| 12       | 0.0646400 | 0.1126151 | 3.8027126  | 2.9405910 | 0.0863881 | 5.08       | IId                   | 2    |
| 13       | 0.0522444 | 0.0926442 | 25.2075402 | 3.9906128 | 0.1171719 | 4.05       | 4a                    | 3    |
| 14       | 0.0538638 | 0.1097202 | 20.7111210 | 3.8794755 | 0.1079478 | 5.26       | 4b                    | 3    |
| 15       | 0.0451378 | 0.1281958 | 16.3328951 | 4.1582659 | 0.1109642 | 2.62       | 4c                    | 3    |
| 16       | 0.0609398 | 0.1451275 | 6.5802371  | 4.5240353 | 0.1094510 | 5.05       | LP-1                  | 4    |
| 17       | 0.0610683 | 0.1323146 | 6.6710082  | 4.0286502 | 0.0959868 | 6.04       | LP-2                  | 4    |
| 18       | 0.0609842 | 0.1204137 | 5.9517260  | 3.6794902 | 0.0880607 | 5.35       | LP-3                  | 4    |
| 19       | 0.0616440 | 0.1304654 | 5.6258422  | 3.9561696 | 0.1209219 | 4.02       | LP-4                  | 5    |
| 20       | 0.0577100 | 0.0921068 | 19.6625025 | 3.6961125 | 0.1280541 | 4.47       | LP-5                  | 5    |

Table 1 continued from previous page

| Molecule | G         | O         | D          | A         | LHE       | PCE (exp.) | Molecule name<br>in Ref. | Ref. |
|----------|-----------|-----------|------------|-----------|-----------|------------|--------------------------|------|
| 21       | 0.0421651 | 0.1225426 | 20.2310204 | 4.2740513 | 0.1346527 | 6.14       | LP-6                     | 5    |
| 22       | 0.0431682 | 0.0832682 | 31.9452022 | 3.6657477 | 0.1031059 | 6.46       | LP-11                    | 6    |
| 23       | 0.0300687 | 0.1006932 | 37.1778862 | 4.0805418 | 0.1069056 | 7.37       | LP-12                    | 6    |
| 24       | 0.0651594 | 0.0924354 | 2.5485089  | 2.6158141 | 0.0594725 | 3.94       | N-1                      | 7    |
| 25       | 0.0636379 | 0.0849677 | 0.9614710  | 2.4923765 | 0.0635152 | 2.93       | N-2                      | 7    |
| 26       | 0.0614332 | 0.0902923 | 3.9628319  | 2.7286297 | 0.0559813 | 4.16       | N-3                      | 7    |
| 27       | 0.0623167 | 0.1319958 | 16.7910857 | 4.4047664 | 0.0927662 | 1.69       | cz-4                     | 8    |
| 28       | 0.0624102 | 0.1261617 | 15.8280472 | 4.1983894 | 0.0886179 | 2.13       | cz-6                     | 8    |
| 29       | 0.0623065 | 0.1152013 | 14.7572428 | 3.8539791 | 0.0813854 | 1.30       | cz-10                    | 8    |
| 30       | 0.0657199 | 0.1581280 | 4.5349031  | 4.5953904 | 0.1068553 | 3.01       | ZnP                      | 9    |
| 31       | 0.0652765 | 0.1240605 | 9.0586813  | 3.7328133 | 0.1144729 | 3.47       | CZ-ZnP                   | 9    |
| 32       | 0.0540346 | 0.1245887 | 8.9207224  | 3.6745778 | 0.1086988 | 3.62       | IDB-ZnP                  | 9    |
| 33       | 0.0542926 | 0.1312902 | 4.9425365  | 3.6583189 | 0.1141326 | 2.55       | ISB-ZnP                  | 9    |
| 34       | 0.0641569 | 0.1674612 | 4.4436781  | 4.5929910 | 0.1072287 | 0.95       | 4a                       | 10   |
| 35       | 0.0643061 | 0.1241872 | 3.5871889  | 3.3790816 | 0.0777495 | 1.23       | 4b                       | 10   |
| 36       | 0.0613149 | 0.1523029 | 4.0288707  | 4.2330484 | 0.1136030 | 0.55       | 5a                       | 10   |
| 37       | 0.0614268 | 0.1202159 | 2.5602694  | 3.2368591 | 0.0848363 | 0.90       | 5b                       | 10   |
| 38       | 0.0305762 | 0.0850418 | 7.1037800  | 2.1842021 | 0.0630336 | 4.84       | GY21                     | 11   |
| 39       | 0.0381284 | 0.0913519 | 5.7311743  | 2.1392080 | 0.0654496 | 8.90       | GY50                     | 11   |
| 40       | 0.0698013 | 0.1340860 | 12.2788772 | 3.9427723 | 0.1108234 | 4.11       | Zn-1                     | 12   |
| 41       | 0.0694326 | 0.1195924 | 11.2653050 | 3.4081137 | 0.0944323 | 4.80       | Zn-2                     | 12   |
| 42       | 0.0714856 | 0.1359144 | 5.2975855  | 3.6566619 | 0.1040171 | 0.89       | Zn-4                     | 12   |
| 43       | 0.0681198 | 0.1270787 | 9.9687732  | 3.8465629 | 0.1137559 | 5.20       | Zn-3                     | 13   |

Table 1 continued from previous page

| Molecule | G         | O         | D          | A         | LHE       | PCE (exp.) | Molecule name<br>in Ref. | Ref. |
|----------|-----------|-----------|------------|-----------|-----------|------------|--------------------------|------|
| 44       | 0.0701037 | 0.1369030 | 8.4470794  | 3.9188586 | 0.1102227 | 4.00       | Zn-5                     | 13   |
| 45       | 0.0606876 | 0.1390918 | 17.4673304 | 4.2028109 | 0.1092884 | 4.00       | Zn-8                     | 13   |
| 46       | 0.0699891 | 0.1261839 | 12.3239482 | 3.7383974 | 0.1082790 | 2.40       | Zn-11                    | 13   |
| 47       | 0.0647567 | 0.1188279 | 23.4547244 | 4.1144920 | 0.1151459 | 3.70       | Zn-13                    | 13   |
| 48       | 0.0574624 | 0.1354942 | 16.3196090 | 4.0872576 | 0.1061092 | 5.10       | GD-1                     | 14   |
| 49       | 0.0576122 | 0.1242851 | 15.3547937 | 3.8095844 | 0.0999381 | 7.10       | GD-2                     | 14   |
| 50       | 0.0578275 | 0.1148293 | 14.2016937 | 3.5310991 | 0.0931519 | 5.80       | GD-3                     | 14   |
| 51       | 0.0579618 | 0.1003757 | 12.4794999 | 3.0905908 | 0.0813659 | 6.40       | GD-4                     | 14   |
| 52       | 0.0580412 | 0.0798598 | 10.0239670 | 2.4717253 | 0.0653706 | 5.30       | GD-5                     | 14   |
| 53       | 0.0574176 | 0.1220547 | 14.2477433 | 3.5191403 | 0.0919278 | 6.10       | GD-6                     | 14   |
| 54       | 0.0633787 | 0.0996594 | 11.8911212 | 2.9677537 | 0.0637155 | 2.08       | 1b-d-Zn                  | 15   |
| 55       | 0.0583384 | 0.0724674 | 16.5569083 | 3.2440629 | 0.0688259 | 2.37       | 2b-bd-Zn                 | 15   |
| 56       | 0.0518869 | 0.0723033 | 17.3013189 | 3.0943628 | 0.0677597 | 3.03       | 2b-bdta-Zn               | 15   |
| 57       | 0.0711670 | 0.1112677 | 2.3188779  | 2.5824263 | 0.0704301 | 4.34       | YD-0                     | 16   |
| 58       | 0.0571101 | 0.1044525 | 3.6465939  | 2.5374905 | 0.0726405 | 6.15       | YD-1                     | 16   |
| 59       | 0.0707163 | 0.1077785 | 2.4395716  | 2.5352951 | 0.0589497 | 6.56       | YD-2                     | 16   |
| 60       | 0.0477547 | 0.1072710 | 4.8059315  | 2.6988464 | 0.0774612 | 5.34       | YD-3                     | 16   |
| 61       | 0.0529775 | 0.0992576 | 3.3021361  | 2.3825721 | 0.0687246 | 5.65       | YD-4                     | 16   |
| 62       | 0.0395915 | 0.0795812 | 4.2701956  | 2.1760608 | 0.0820473 | 2.10       | YD-5                     | 16   |
| 63       | 0.0458267 | 0.1040151 | 5.9300487  | 2.6847999 | 0.0822526 | 5.13       | YD-6                     | 16   |
| 64       | 0.0434028 | 0.0969086 | 14.8000218 | 2.9669484 | 0.0867171 | 4.38       | YD-7                     | 16   |
| 65       | 0.0513111 | 0.0706299 | 14.4246611 | 2.4099288 | 0.0734713 | 4.27       | YD-8                     | 16   |
| 66       | 0.0711670 | 0.1112677 | 2.3188779  | 2.5824263 | 0.0704301 | 5.00       | YD0                      | 17   |

Table 1 continued from previous page

| Molecule | G         | O         | D          | A         | LHE        | PCE (exp.) | Molecule name<br>in Ref. | Ref. |
|----------|-----------|-----------|------------|-----------|------------|------------|--------------------------|------|
| 67       | 0.0707163 | 0.1077785 | 2.4395716  | 2.5352951 | 0.0589497  | 7.10       | YD2                      | 17   |
| 68       | 0.0542112 | 0.0772139 | 4.0564086  | 2.3031583 | 0.0732740  | 6.80       | YD14                     | 17   |
| 69       | 0.0439099 | 0.0694964 | 15.4810452 | 2.6246536 | 0.0880480  | 4.20       | YD15                     | 17   |
| 70       | 0.0519541 | 0.0689608 | 8.8103707  | 2.2925680 | 0.0848171  | 5.50       | YD16                     | 17   |
| 71       | 0.0561651 | 0.0926398 | 3.2137225  | 2.1946879 | 0.0616570  | 7.00       | YD17                     | 17   |
| 72       | 0.0317356 | 0.0430464 | 28.3898544 | 2.2488689 | 0.1006172  | 6.69       | XY1                      | 18   |
| 73       | 0.0307369 | 0.0464320 | 27.0144801 | 2.3217648 | 0.0995922  | 6.89       | XY2                      | 18   |
| 74       | 0.0246106 | 0.0435574 | 30.4748570 | 2.2702888 | 0.0990199  | 5.50       | XY3                      | 18   |
| 75       | 0.0597190 | 0.0587322 | 22.1780946 | 2.3657366 | 0.0860160  | 3.64       | CCT1A                    | 19   |
| 76       | 0.0533135 | 0.0637261 | 27.7841165 | 2.6894384 | 0.0914474  | 4.80       | CCT2A                    | 19   |
| 77       | 0.0489295 | 0.0682620 | 35.6102724 | 2.9571414 | 0.0925016  | 5.25       | CCT3A                    | 19   |
| 78       | 0.0555831 | 0.0730346 | 4.2128616  | 1.9403036 | 0.0561517  | 7.60       | YD-2-OC8                 | 20   |
| 79       | 0.0555831 | 0.0730346 | 4.2128616  | 1.9403036 | 0.0561517  | 9.40       | YD-2-OC8                 | 20   |
| 80       | 0.0741501 | 0.1123608 | 1.0770695  | 2.3705037 | 0.0688793  | 4.01       | 1PEP                     | 21   |
| 81       | 0.0740513 | 0.1280516 | 3.6765154  | 2.6671958 | 0.0797870  | 2.55       | 2PEP                     | 21   |
| 82       | 0.0740785 | 0.1327977 | 10.0882432 | 2.9577075 | 0.0915939  | 0.58       | 3PEP                     | 21   |
| 83       | 0.0612046 | 0.0808118 | 17.5427761 | 2.7310944 | 0.0796227  | 2.22       | Q1                       | 22   |
| 84       | 0.0643443 | 0.0793069 | 13.3271717 | 2.5787145 | 0.0770773  | 5.51       | Q2                       | 22   |
| 85       | 0.0651000 | 0.0628752 | 8.7421524  | 1.8751841 | 0.0563655  | 7.13       | XW1                      | 22   |
| 86       | 0.0633436 | 0.0679377 | 9.2710832  | 1.9548001 | 0.0590251  | 6.84       | XW2                      | 22   |
| 87       | 0.0601367 | 0.0710189 | 6.1817574  | 1.8861611 | 0.0571289  | 7.32       | XW3                      | 22   |
| 88       | 0.0615689 | 0.0691939 | 3.7172860  | 1.7146918 | 0.0516344  | 7.94       | XW4                      | 22   |
| 89       | 0.0552887 | 0.0758360 | 32.3656110 | 2.8962656 | 0.11117750 | 9.10       | TA-ST-CA                 | 23   |

Table 1 continued from previous page

| Molecule | G         | O         | D          | A         | LHE       | PCE (exp.) | Molecule name<br>in Ref. | Ref. |
|----------|-----------|-----------|------------|-----------|-----------|------------|--------------------------|------|
| 90       | 0.0524638 | 0.0783148 | 29.8457557 | 3.3269538 | 0.1064191 | 6.72       | DP1P                     | 24   |
| 91       | 0.0488015 | 0.0745953 | 28.6722651 | 3.0716907 | 0.0952905 | 7.05       | OMeDP1P                  | 24   |
| 92       | 0.0503438 | 0.0542790 | 20.7832498 | 2.2597189 | 0.0717968 | 7.64       | OHexDP1P                 | 24   |
| 93       | 0.0481101 | 0.0767060 | 31.6898283 | 3.3072438 | 0.1135833 | 5.22       | M-TP                     | 24   |
| 94       | 0.0520232 | 0.0448104 | 12.8216249 | 1.4405117 | 0.0593717 | 4.60       | PFT1                     | 25   |
| 95       | 0.0527270 | 0.0580806 | 16.1220258 | 1.8478817 | 0.0745614 | 5.81       | PFT2                     | 25   |
| 96       | 0.0498505 | 0.0463602 | 18.2618960 | 1.7550009 | 0.0653839 | 6.10       | PFT4                     | 25   |
| 97       | 0.0490678 | 0.0578566 | 25.0361823 | 2.2980821 | 0.0810550 | 6.19       | PFT5                     | 25   |
| 98       | 0.0500541 | 0.0575150 | 23.8612992 | 2.2342677 | 0.0812448 | 5.76       | PFT6                     | 25   |
| 99       | 0.0549575 | 0.0884838 | 34.8488172 | 3.4904077 | 0.1125149 | 3.50       | DP1                      | 26   |
| 100      | 0.0461346 | 0.0996140 | 24.9309775 | 4.0957710 | 0.1132304 | 4.70       | DP2                      | 26   |
| 101      | 0.0493274 | 0.0817432 | 37.2108174 | 3.5345121 | 0.1058133 | 1.50       | DP3                      | 26   |
| 102      | 0.0407387 | 0.0892162 | 27.3739533 | 3.8124314 | 0.1063739 | 2.20       | DP4                      | 26   |
| 103      | 0.0841135 | 0.2057307 | 7.1010683  | 2.7208610 | 0.0664321 | 1.32       | PR1                      | 27   |
| 104      | 0.0517700 | 0.1100617 | 28.0466053 | 3.7487154 | 0.1069148 | 2.01       | PR2                      | 27   |
| 105      | 0.0552221 | 0.0880710 | 37.5865174 | 3.2462465 | 0.1093803 | 4.51       | 1a                       | 28   |
| 106      | 0.0515456 | 0.0737763 | 38.6887253 | 3.1875722 | 0.1159729 | 4.30       | 2a                       | 28   |
| 107      | 0.0448888 | 0.0806014 | 43.4726481 | 3.4968618 | 0.1139284 | 1.87       | 3a                       | 28   |
| 108      | 0.0617975 | 0.0825254 | 32.6481218 | 3.0964956 | 0.1122582 | 3.40       | 4a                       | 28   |
| 109      | 0.0508722 | 0.0699902 | 37.6127881 | 3.1095210 | 0.1164795 | 4.81       | 5a                       | 28   |
| 110      | 0.0563576 | 0.0601751 | 26.4729997 | 2.2710818 | 0.0797090 | 4.01       | 1b                       | 28   |
| 111      | 0.0520953 | 0.0519731 | 27.7355773 | 2.2763563 | 0.0844611 | 4.53       | 2b                       | 28   |
| 112      | 0.0453090 | 0.0571239 | 30.8566665 | 2.5021194 | 0.0831224 | 3.60       | 3b                       | 28   |



Table 1 continued from previous page

| Molecule | G         | O         | D          | A         | LHE       | PCE (exp.) | Molecule name<br>in Ref. | Ref. |
|----------|-----------|-----------|------------|-----------|-----------|------------|--------------------------|------|
| 113      | 0.0641378 | 0.0582832 | 21.5817121 | 2.0887966 | 0.0829236 | 3.31       | 4b                       | 28   |
| 114      | 0.0519093 | 0.0478448 | 25.8112761 | 2.1736651 | 0.0837734 | 4.89       | 5b                       | 28   |
| 115      | 0.0345478 | 0.1158408 | 22.4026301 | 3.6692020 | 0.1043632 | 0.95       | 4a                       | 29   |
| 116      | 0.0313985 | 0.0958721 | 24.1906637 | 3.2062762 | 0.1334664 | 4.51       | 4b                       | 29   |
| 117      | 0.0500921 | 0.0891723 | 37.2959570 | 3.6383843 | 0.1148349 | 3.68       | 3a                       | 30   |
| 118      | 0.0439812 | 0.0787065 | 37.1605931 | 3.4551607 | 0.1125992 | 0.35       | 3b                       | 30   |
| 119      | 0.0553125 | 0.0651710 | 8.2952616  | 2.0958641 | 0.0608170 | 7.95       | JY47                     | 31   |
| 120      | 0.0360465 | 0.0753090 | 11.4781473 | 2.3113859 | 0.0710253 | 8.44       | JY48                     | 31   |
| 121      | 0.0361144 | 0.0742704 | 12.0550747 | 2.3025053 | 0.0739827 | 7.84       | JY49                     | 31   |
| 122      | 0.0726905 | 0.1329466 | 2.1572703  | 3.2870702 | 0.0677228 | 1.87       | PD1                      | 32   |
| 123      | 0.0542564 | 0.0879329 | 9.4990120  | 3.2851808 | 0.1168215 | 2.74       | PD2                      | 32   |
| 124      | 0.0411915 | 0.0919867 | 23.8557771 | 3.0991290 | 0.0867796 | 1.61       | CVHTP                    | 33   |
| 125      | 0.0618008 | 0.0858590 | 22.5883618 | 2.9804705 | 0.0835124 | 1.12       | CVHTC                    | 33   |
| 126      | 0.0413066 | 0.0959144 | 28.5044492 | 3.4460743 | 0.0980040 | 3.20       | CVTC-H-CVTP              | 33   |
| 127      | 0.0394775 | 0.0372875 | 12.1225083 | 1.3838718 | 0.0763475 | 6.20       | C1                       | 34   |
| 128      | 0.0456119 | 0.0312782 | 11.7898422 | 1.3341227 | 0.0758650 | 4.74       | C2                       | 34   |
| 129      | 0.0344904 | 0.0305524 | 13.4128932 | 1.3582548 | 0.0765701 | 1.42       | C3                       | 34   |
| 130      | 0.0291520 | 0.0716024 | 10.9348966 | 1.6340496 | 0.0940685 | 6.14       | ND                       | 35   |
| 131      | 0.0460617 | 0.0628970 | 20.4731641 | 2.6530180 | 0.0837996 | 7.42       | SC1                      | 36   |
| 132      | 0.0455990 | 0.0645827 | 19.3184989 | 2.7756639 | 0.0840953 | 6.45       | SC2                      | 36   |
| 133      | 0.0456559 | 0.0517875 | 16.1174775 | 2.2321817 | 0.0688872 | 6.53       | SC3                      | 36   |
| 134      | 0.0541271 | 0.0490485 | 31.4490748 | 2.5346917 | 0.0930642 | 6.90       | M81                      | 37   |
| 135      | 0.0534775 | 0.0699740 | 38.1812534 | 3.1046537 | 0.0996195 | 6.15       | M82                      | 37   |

Table 1 continued from previous page

| Molecule | G         | O         | D          | A         | LHE       | PCE (exp.) | Molecule name<br>in Ref. | Ref. |
|----------|-----------|-----------|------------|-----------|-----------|------------|--------------------------|------|
| 136      | 0.0479043 | 0.0497461 | 15.8997758 | 1.9558896 | 0.0709909 | 4.43       | M83                      | 37   |
| 137      | 0.0500849 | 0.0529846 | 16.4925284 | 1.9671548 | 0.0680051 | 7.59       | M84                      | 37   |
| 138      | 0.0582135 | 0.0878282 | 14.5325216 | 2.8137256 | 0.0696394 | 5.99       | M85                      | 37   |
| 139      | 0.0841303 | 0.1048041 | 8.8130411  | 1.8789629 | 0.0704406 | 0.72       | DEA-Q                    | 38   |
| 140      | 0.0506190 | 0.0810102 | 19.6715293 | 2.4798638 | 0.0966150 | 0.75       | CBZ-Q                    | 38   |
| 141      | 0.0427224 | 0.0587965 | 19.0172584 | 2.1543939 | 0.0815758 | 3.07       | BPA-Q                    | 38   |
| 142      | 0.0604350 | 0.0693764 | 19.8577933 | 2.8935371 | 0.1174360 | 5.65       | FWD1                     | 39   |
| 143      | 0.0580204 | 0.0904394 | 25.7566080 | 3.8867700 | 0.1120075 | 6.04       | FWD2                     | 39   |
| 144      | 0.0603457 | 0.0841191 | 24.1186544 | 3.0040282 | 0.1209318 | 5.19       | FWD3                     | 39   |
| 145      | 0.0447695 | 0.0547394 | 14.2904317 | 1.9386081 | 0.0923815 | 5.64       | ZHG5                     | 40   |
| 146      | 0.0451923 | 0.0616264 | 15.9976067 | 2.0818389 | 0.0926777 | 5.32       | ZHG6                     | 40   |
| 147      | 0.0458692 | 0.0373386 | 23.6356043 | 1.8225969 | 0.0889805 | 2.74       | ZHG7                     | 40   |
| 148      | 0.0494562 | 0.0880206 | 13.2479744 | 2.3711061 | 0.0752384 | 7.55       | TBCPCA-1                 | 41   |
| 149      | 0.0492978 | 0.0832383 | 12.9728251 | 2.2690494 | 0.0724452 | 7.97       | TBCPCA-2                 | 41   |
| 150      | 0.0485320 | 0.0512228 | 14.9746384 | 2.0241526 | 0.0883079 | 7.11       | TBTCPCA-1                | 41   |
| 151      | 0.0483990 | 0.0496290 | 14.8755703 | 1.9700435 | 0.0861409 | 6.17       | TBTCPCA-2                | 41   |
| 152      | 0.0492426 | 0.0283154 | 12.9889047 | 2.1688351 | 0.0802441 | 1.40       | FBA1                     | 42   |
| 153      | 0.0602150 | 0.0240906 | 13.0003237 | 1.6102805 | 0.0687187 | 2.10       | FBA2                     | 42   |
| 154      | 0.0600001 | 0.0184357 | 9.9806662  | 1.2505838 | 0.0533310 | 2.50       | FBA3                     | 42   |
| 155      | 0.0644035 | 0.0660986 | 26.6569484 | 2.6446677 | 0.0830919 | 5.20       | CD-1                     | 43   |
| 156      | 0.0663843 | 0.0592458 | 24.1027450 | 2.3756802 | 0.0912346 | 4.10       | CD-2                     | 43   |
| 157      | 0.0687606 | 0.0537808 | 22.3137242 | 2.2149987 | 0.0990528 | 3.50       | CD-3                     | 43   |
| 158      | 0.0156502 | 0.0539460 | 18.7662736 | 1.9177332 | 0.0854602 | 3.37       | SC32                     | 44   |

Table 1 continued from previous page

| Molecule | G         | O         | D          | A         | LHE       | PCE (exp.) | Molecule name<br>in Ref. | Ref. |
|----------|-----------|-----------|------------|-----------|-----------|------------|--------------------------|------|
| 159      | 0.0442793 | 0.0535942 | 23.5056563 | 2.2802517 | 0.0823760 | 6.52       | SC33                     | 44   |
| 160      | 0.0437057 | 0.0534638 | 23.9861220 | 2.2521598 | 0.0812267 | 7.07       | SC35                     | 44   |
| 161      | 0.0430359 | 0.0390825 | 20.6383475 | 1.8277278 | 0.0692110 | 7.38       | SC36                     | 44   |
| 162      | 0.0442080 | 0.0424417 | 21.7986307 | 1.9608395 | 0.0737957 | 6.70       | SC36N                    | 44   |
| 163      | 0.0527280 | 0.0575476 | 17.7988149 | 3.0560310 | 0.0944754 | 7.44       | D1                       | 45   |
| 164      | 0.0522667 | 0.0940092 | 22.8766610 | 3.0570864 | 0.0904328 | 6.64       | D2                       | 45   |
| 165      | 0.0521401 | 0.0628896 | 31.3356719 | 2.8531441 | 0.0880253 | 6.72       | D3                       | 45   |
| 166      | 0.0527717 | 0.0704874 | 37.1575169 | 3.0258481 | 0.0983773 | 6.06       | D4                       | 45   |
| 167      | 0.0659430 | 0.0741071 | 21.0042222 | 2.4773849 | 0.0765677 | 7.39       | QX11                     | 46   |
| 168      | 0.0695141 | 0.0792216 | 15.6467279 | 2.3310899 | 0.0709776 | 7.64       | QX12                     | 46   |
| 169      | 0.0657324 | 0.0589542 | 16.9540920 | 1.9888067 | 0.0620891 | 6.95       | QX13                     | 46   |
| 170      | 0.0692903 | 0.0572709 | 13.9197013 | 1.8434155 | 0.0581264 | 6.52       | QX14                     | 46   |
| 171      | 0.0317029 | 0.0510672 | 40.7211582 | 2.8327700 | 0.0826220 | 1.10       | DPP1                     | 47   |
| 172      | 0.0322922 | 0.0353959 | 25.9853729 | 1.9561253 | 0.0669555 | 1.40       | DPP2                     | 47   |
| 173      | 0.0315614 | 0.0362411 | 30.0719430 | 2.0737607 | 0.0601351 | 1.80       | DPP3                     | 47   |
| 174      | 0.0345150 | 0.0332382 | 26.2949546 | 1.8979877 | 0.0684235 | 2.20       | DPP4                     | 47   |
| 175      | 0.0417351 | 0.0745864 | 50.8924433 | 3.7784633 | 0.1065326 | 0.60       | PE4T                     | 47   |
| 176      | 0.0468692 | 0.0581254 | 28.2242522 | 2.7360594 | 0.0668775 | 3.40       | MK-2                     | 47   |
| 177      | 0.0392516 | 0.0690701 | 15.5298974 | 2.4799794 | 0.0930063 | 7.19       | QBT-3                    | 48   |
| 178      | 0.0388931 | 0.0701548 | 13.8409102 | 2.4168808 | 0.0868444 | 6.78       | CTY-1                    | 48   |
| 179      | 0.0292251 | 0.0640481 | 17.4939690 | 2.5255762 | 0.0904998 | 8.27       | CTY-2                    | 48   |
| 180      | 0.0388931 | 0.0701548 | 13.8409102 | 2.4168808 | 0.0868444 | 7.60       | CTY-3                    | 48   |
| 181      | 0.0292251 | 0.0640481 | 17.4939690 | 2.5255762 | 0.0904998 | 8.10       | CTY-4                    | 48   |

Table 1 continued from previous page

| Molecule | G         | O         | D          | A         | LHE       | PCE (exp.) | Molecule name<br>in Ref. | Ref. |
|----------|-----------|-----------|------------|-----------|-----------|------------|--------------------------|------|
| 182      | 0.0712902 | 0.0833525 | 1.2577618  | 2.0866102 | 0.0536498 | 5.03       | ZnP3C                    | 49   |
| 183      | 0.0504375 | 0.0716576 | 26.5928157 | 2.8331785 | 0.0632194 | 1.65       | X66                      | 50   |
| 184      | 0.0508574 | 0.0682930 | 23.8054083 | 2.6036665 | 0.0662447 | 3.67       | X67                      | 50   |
| 185      | 0.0505090 | 0.0706008 | 24.3234921 | 2.6846997 | 0.0675389 | 3.24       | X68                      | 50   |
| 186      | 0.0509958 | 0.0609839 | 22.9207043 | 2.4686164 | 0.0739502 | 4.21       | X69                      | 50   |
| 187      | 0.0671807 | 0.0805556 | 1.0923534  | 1.8670982 | 0.0481617 | 9.01       | LD14                     | 51   |
| 188      | 0.0669543 | 0.0880626 | 1.2356082  | 1.9481770 | 0.0490203 | 9.53       | LW4                      | 51   |
| 189      | 0.0669449 | 0.0900709 | 2.4224591  | 2.0487544 | 0.0517304 | 8.16       | LW5                      | 51   |
| 190      | 0.0489638 | 0.1000547 | 2.5089851  | 2.1347794 | 0.0576524 | 9.21       | LW24                     | 51   |
| 191      | 0.0525938 | 0.1101084 | 17.2953206 | 3.1584463 | 0.0835753 | 4.39       | T2-1                     | 52   |
| 192      | 0.0225351 | 0.0843428 | 22.3894841 | 2.8046683 | 0.1199625 | 5.89       | PZ-1                     | 52   |
| 193      | 0.0180974 | 0.0672775 | 22.0673579 | 2.4616481 | 0.1245091 | 2.62       | PZ-2                     | 52   |
| 194      | 0.0209844 | 0.0739312 | 22.0094535 | 2.5514273 | 0.1238206 | 4.97       | PZ-3                     | 52   |
| 195      | 0.0208503 | 0.0634133 | 21.2871276 | 2.3910134 | 0.1047528 | 6.35       | PZ-4                     | 52   |
| 196      | 0.0689817 | 0.0648257 | 12.9473879 | 3.2856018 | 0.0957432 | 1.37       | OF-Car-Car               | 53   |
| 197      | 0.0819577 | 0.0826697 | 4.6338681  | 2.7784854 | 0.0916952 | 2.04       | OF-Py-Py                 | 53   |
| 198      | 0.0705968 | 0.0729861 | 32.3979744 | 3.2201559 | 0.0995803 | 0.07       | OF-Cat-Cat               | 53   |
| 199      | 0.0749618 | 0.0810413 | 27.3428612 | 2.9627925 | 0.0992052 | 1.51       | OF-Py-Car                | 53   |
| 200      | 0.0753765 | 0.0785730 | 10.4911300 | 3.1440620 | 0.0995364 | 0.06       | OF-Py-Cat                | 53   |
| 201      | 0.0632342 | 0.0887058 | 20.0629795 | 2.8690664 | 0.1030617 | 1.75       | MH                       | 54   |
| 202      | 0.0601685 | 0.0807677 | 21.7355627 | 3.0067993 | 0.1096920 | 0.99       | MT                       | 54   |
| 203      | 0.0569366 | 0.0858796 | 10.8433973 | 3.6573353 | 0.0965582 | 2.70       | DH                       | 54   |
| 204      | 0.0551298 | 0.0692840 | 11.0962548 | 3.6412735 | 0.1094707 | 1.42       | DT                       | 54   |

Table 1 continued from previous page

| Molecule | G         | O         | D          | A         | LHE       | PCE (exp.) | Molecule name<br>in Ref. | Ref. |
|----------|-----------|-----------|------------|-----------|-----------|------------|--------------------------|------|
| 205      | 0.0642779 | 0.0940782 | 18.5053841 | 3.0665354 | 0.1097282 | 2.31       | TPAC1                    | 54   |
| 206      | 0.0578251 | 0.0767625 | 11.2128556 | 3.6531465 | 0.1069505 | 2.73       | TPAC2                    | 54   |

## References

- [1] X. Liu, C. Li, X. Peng, Y. Zhou, Z. Zeng, Y. Li, T. Zhang, B. Zhang, Y. Dong, D. Sun, P. Cheng and Y. Feng, *Dyes and Pigments*, 2013, **98**, 181–189.
- [2] Z. Zeng, B. Zhang, C. Li, X. Peng, X. Liu and S. Meng, *Dyes and Pigments*, 2014, **100**, 278–285.
- [3] Y. Liang, X. Xue, W. Zhang, C. Fan, Y. Li, B. Zhang and Y. Feng, *Dyes and Pigments*, 2015, **115**, 7–16.
- [4] F. Lu, J. Zhang, Y. Zhou, Y. Zhao, B. Zhang and Y. Feng, *Dyes and Pigments*, 2016, **125**, 116–123.
- [5] F. Lu, Y. Feng, X. Wang, Y. Zhao and G. Yang, *Dyes and Pigments*, 2017, **139**, 255–263.
- [6] F. Lu, X. Wang, Y. Zhao, G. Yang, J. Zhang, B. Zhang and Y. Feng, *Journal of Power Sources*, 2016, **333**, 1–9.
- [7] N. Zhang, B. Zhang, J. Yan, X. Xue and X. Peng, *Renewable Energy*, 2015, **77**, 579–585.
- [8] X. Xue, W. Zhang, N. Zhang, C. Ju, X. Peng, Y. Yang, Y. Liang, Y. Feng and B. Zhang, *RSC Advances*, 2014, **4**, 8894–8900.
- [9] Y. Zhou, N. A. Lee, K. T. Ngo and X. Peng, *RSC Advances*, 2015, **5**, 41193–41202.
- [10] N. Zhang, B. Zhang, L. Sun and Y. Li, *Research on Chemical Intermediates*, 2015, **41**, 8713–8724.
- [11] A. Yella, C.-L. Mai, S. M. Zakeeruddin, S.-N. Chang, C.-H. Hsieh, C.-Y. Yeh and M. Grätzel, *Angewandte Chemie International Edition*, 2014, **53**, 2973–2977.
- [12] M. K. Nazeeruddin, R. Humphry-Baker, D. L. Officer, W. M. Campbell, A. K. Burrell and M. Grätzel, *Langmuir*, 2004, **20**, 6514–6517.
- [13] Q. Wang, W. M. Campbell, E. E. Bonfantani, K. W. Jolley, D. L. Officer, P. J. Walsh, K. Gordon, R. Humphry-Baker, M. K. Nazeeruddin and M. Grätzel, *Journal of Physical Chemistry B*, 2005, **109**, 15397–15409.

- [14] W. M. Campbell, K. W. Jolley, P. Wagner, K. Wagner, P. J. Walsh, K. C. Gordon, L. Schmidt-Mende, M. K. Nazeeruddin, Q. Wang, M. Grätzel and D. L. Officer, *Journal of Physical Chemistry C*, 2007, **111**, 11760–11762.
- [15] J. K. Park, H. R. Lee, J. P. Chen, H. Shinokubo, A. Osuka and D. Kim, *Journal of Physical Chemistry C*, 2008, **112**, 16691–16699.
- [16] C.-P. Hsieh, H.-P. Lu, C.-L. Chiu, C.-W. Lee, S.-H. Chuang, C.-L. Mai, W.-N. Yen, S.-J. Hsu, E. W.-G. Diau and C.-Y. Yeh, *Journal of Materials Chemistry*, 2010, **20**, 1127–1134.
- [17] S.-L. Wu, H.-P. Lu, H.-T. Yu, S.-H. Chuang, C.-L. Chiu, C.-W. Lee, E. W.-G. Diau and C.-Y. Yeh, *Energy & Environmental Science*, 2010, **3**, 949–955.
- [18] Y. Li, B. Xu, P. Song, F. Ma and M. Sun, *The Journal of Physical Chemistry C*, 2017, **121**, 12546–12561.
- [19] S. Jungsuttiwong, R. Tarsang, T. Sudyoadsuk, V. Promarak, P. Khongpracha and S. Namuangruk, *Organic Electronics: physics, materials, applications*, 2013, **14**, 711–722.
- [20] A. Yella, H.-W. Lee, H. N. Tsao, C. Yi, A. K. Chanderan, M. Nazeeruddin, E. W.-G. Diau, C.-Y. Yeh, S. M. Zakeeruddin and M. Grätzel, *Science*, 2011, **334**, 629 LP – 634.
- [21] T. Keawin, R. Tarsang, K. Sirithip, N. Prachumrak, T. Sudyoadsuk, S. Namuangruk, J. Roncali, N. Kungwan, V. Promarak and S. Jungsuttiwong, *Dyes and Pigments*, 2017, **136**, 697–706.
- [22] Y. Wang, B. Chen, W. Wu, X. Li, W. Zhu, H. Tian and Y. Xie, *Angewandte Chemie - International Edition*, 2014, **53**, 10779–10783.
- [23] S. Hwang, J. H. Lee, C. Park, H. Lee, C. Kim, C. Park, M.-H. Lee, W. Lee, J. Park, K. Kim *et al.*, *Chemical Communications*, 2007, 4887–4889.
- [24] L.-Y. Lin, C.-H. Tsai, K.-T. Wong, T.-W. Huang, C.-C. Wu, S.-H. Chou, F. Lin, S.-H. Chen and A.-I. Tsai, *Journal of Materials Chemistry*, 2011, **21**, 5950–5958.
- [25] C.-J. Liang, C. P. Kumar, C.-T. Li and J. T. Lin, *Asian Journal of Organic Chemistry*, 2018, 1–11.

- [26] D. S. Patil, K. K. Sonigara, M. M. Jadhav, K. C. Avhad, S. Sharma, S. S. Soni and N. Sekar, *New Journal of Chemistry*, 2018, **42**, 4361–4371.
- [27] S. Kotteswaran, M. S. Pandian and P. Ramasamy, *Journal of Materials Science: Materials in Electronics*, 2018, **29**, 6672–6678.
- [28] H. Masui, M. M. Maitani, S. Fuse, A. Yamamura, Y. Ogomi, S. Hayase, T. Kaiho, H. Tanaka, Y. Wada and T. Takahashi, *Asian Journal of Organic Chemistry*, 2018, **7**, 458–464.
- [29] S. S. Fernandes, A. Pereira, D. Ivanou, A. Mendes and M. M. M. Raposo, *Dyes and Pigments*, 2018, **151**, 89–94.
- [30] S. S. M. Fernandes, M. C. R. Castro, A. I. Pereira, A. Mendes, C. Serpa, J. Pina, L. L. G. Justino, H. D. Burrows and M. M. M. Raposo, *ACS Omega*, 2017, **2**, 9268–9279.
- [31] B. Pan, Y. Z. Zhu, D. Ye and J. Y. Zheng, *Dyes and Pigments*, 2018, **150**, 223–230.
- [32] L. Bao, R. Cheruku, S. Thogiti, P. Ho, W. Yang and J. Kim, *Nanoscience and Nanotechnology Letters*, 2017, **9**, 1–7.
- [33] H. Wei, J. Shen, Y. Liu, T. Huang, Q. Zhang, J. Zhao and X. Zhao, *Dyes and Pigments*, 2018, **149**, 789–795.
- [34] L. Zheng, Q. Cao, J. Wang, Z. Chai, G. Cai, Z. Ma, H. Han, Q. Li, Z. Li and H. Chen, *ACS Omega*, 2017, **2**, 7048–7056.
- [35] P. Ferdowsi, Y. Saygili, W. Zhang, T. Edvinson, L. Kavan, J. Mokhtari, S. M. Zakeeruddin, M. Grätzel and A. Hagfeldt, *ChemSusChem*, 2018, **11**, 494–502.
- [36] C. Shen, Y. Wu, W. Zhang, H. Jiang, H. Zhang, E. Li, B. Chen, X. Duan and W. H. Zhu, *Dyes and Pigments*, 2018, **149**, 65–72.
- [37] H. Cheng, Y. Wu, J. Su, Z. Wang, R. P. Ghimire, M. Liang, Z. Sun and S. Xue, *Dyes and Pigments*, 2018, **149**, 16–24.
- [38] M. Mao, J. B. Wang, X. L. Liu, G. H. Wu, X. Q. Fang and Q. H. Song, *Spectrochimica Acta - Part A: Molecular and Biomolecular Spectroscopy*, 2018, **190**, 23–32.



- [39] H. Wang, B. Bao, X. Hu and J. K. Fang, *Electrochimica Acta*, 2017, **250**, 278–284.
- [40] S. G. Chen, H. L. Jia, X. H. Ju and H. G. Zheng, *Dyes and Pigments*, 2017, **146**, 127–135.
- [41] K. Stalindurai, A. Karuppasamy, J. D. Peng, K. C. Ho and C. Ramalingan, *Electrochimica Acta*, 2017, **246**, 1052–1064.
- [42] I. Pecnikaj, D. Minudri, L. Otero, F. Fungo, M. Cavazzini, S. Orlandi and G. Pozzi, *New Journal of Chemistry*, 2017, **41**, 7729–7738.
- [43] R. L. Vekariya, J. V. Vaghasiya and A. Dhar, *Organic Electronics: physics, materials, applications*, 2017, **48**, 291–297.
- [44] S. Chaurasia, C. T. Li, M. B. Desta, J. S. Ni and J. T. Lin, *Chemistry - An Asian Journal*, 2017, **12**, 996–1004.
- [45] C. H. Siu, L. T. L. Lee, P. Y. Ho, C. L. Ho, T. Chen, S. Suramitr, S. Hannongbua, Z. Xie, M. Wei and W. Y. Wong, *Chemistry - An Asian Journal*, 2017, **12**, 332–340.
- [46] X. Qian, R. Yan, C. Xu, L. Shao, H. Li and L. Hou, *Journal of Power Sources*, 2016, **332**, 103–110.
- [47] I. Imae, Y. Ito, S. Matsuura and Y. Harima, *Organic Electronics: physics, materials, applications*, 2016, **37**, 465–473.
- [48] J. S. Ni, T. Y. Chiu, W. S. Kao, H. J. Chou, C. C. Su and J. T. Lin, *ACS Applied Materials and Interfaces*, 2016, **8**, 23066–23073.
- [49] A. Charisiadis, V. Nikolaou, K. Karikis, C. Giatagana, K. Chalepli, K. Ladomenou, S. Biswas, G. D. Sharma and A. G. Coutsolelos, *New Journal of Chemistry*, 2016, **40**, 5930–5941.
- [50] Z. Lu, P. Dai, C. Wang, M. Liang, X. Zong, Z. Sun and S. Xue, *Tetrahedron*, 2016, **72**, 3204–3212.
- [51] J. Lu, H. Li, S. Liu, Y.-c. Chang, H.-p. Wu, Y. Cheng, E. W.-g. Diao and M. Wang, *Physical Chemistry Chemical Physics*, 2016, **18**, 6885–6892.
- [52] X. Zhang, F. Gou, J. Shi, H. Gao, C. Xu, Z. Zhu and H. Jing, *RSC Advances*, 2016, **6**, 106380–106386.

- [53] Y. Ooyama, K. Furue, T. Enoki, M. Kanda, Y. Adachi and J. Ohshita, *Physical Chemistry Chemical Physics*, 2016, **18**, 30662–30676.
- [54] B. Hosseinzadeh, A. S. Beni, M. Azari, M. Zarandi and M. Karami, *New Journal of Chemistry*, 2016, **40**, 8371–8381.
